# Supplementary material for: Anti-Colitic Effects of Ethanol Extract of Persea americana Mill. through Suppression of Pro-Inflammatory Mediators via NF-κB/STAT3 Inactivation in Dextran Sulfate Sodium-Induced Colitis Mice
Source: MDPI journal article supplement (doi:10.3390/ijms20010177), 2019-01-05
Supplement: s1 [file s1]

# Anti-Colitic Effects of Ethanol Extract of *Persea americana* Mill. through Suppression of Pro-Inflammatory Mediators via NF- $\kappa$ B/STAT3 Inactivation in Dextran Sulfate Sodium-Induced Colitis Mice

Joo Young Hong, Kyung-Sook Chung, Ji-Sun Shin, Geonha Park, Young Pyo Jang and Kyung-Tae Lee

Supplementary Data

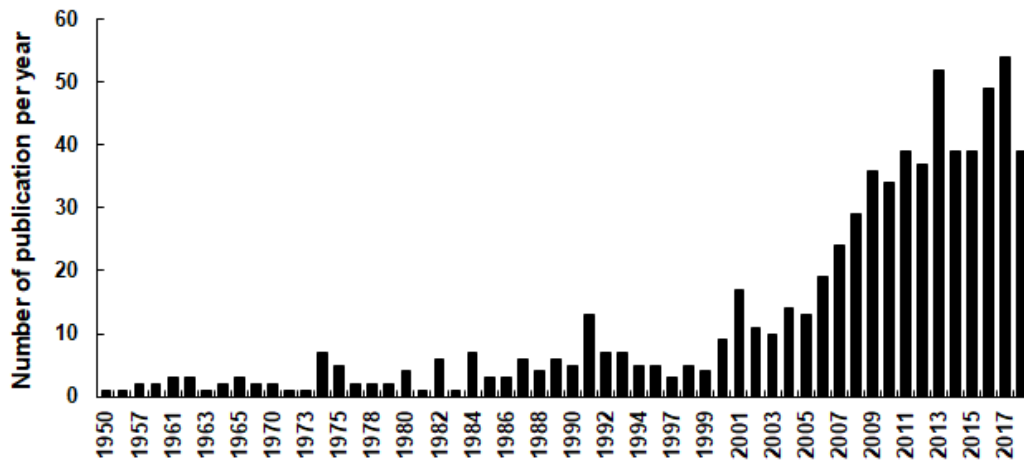

Figure S.1 The number of publication per year about *P. americana*.
